# Supplementary material for: Molecular portraits of patients with intrahepatic cholangiocarcinoma who diverge as rapid progressors or long survivors on chemotherapy
Source: PubMed Central journal article supplement (PMC10894814; doi:10.1136/gutjnl-2023-330748), 2023-09-27
Supplement: gutjnl-2023-330748supp005.pdf [file gutjnl-2023-330748supp005.pdf]

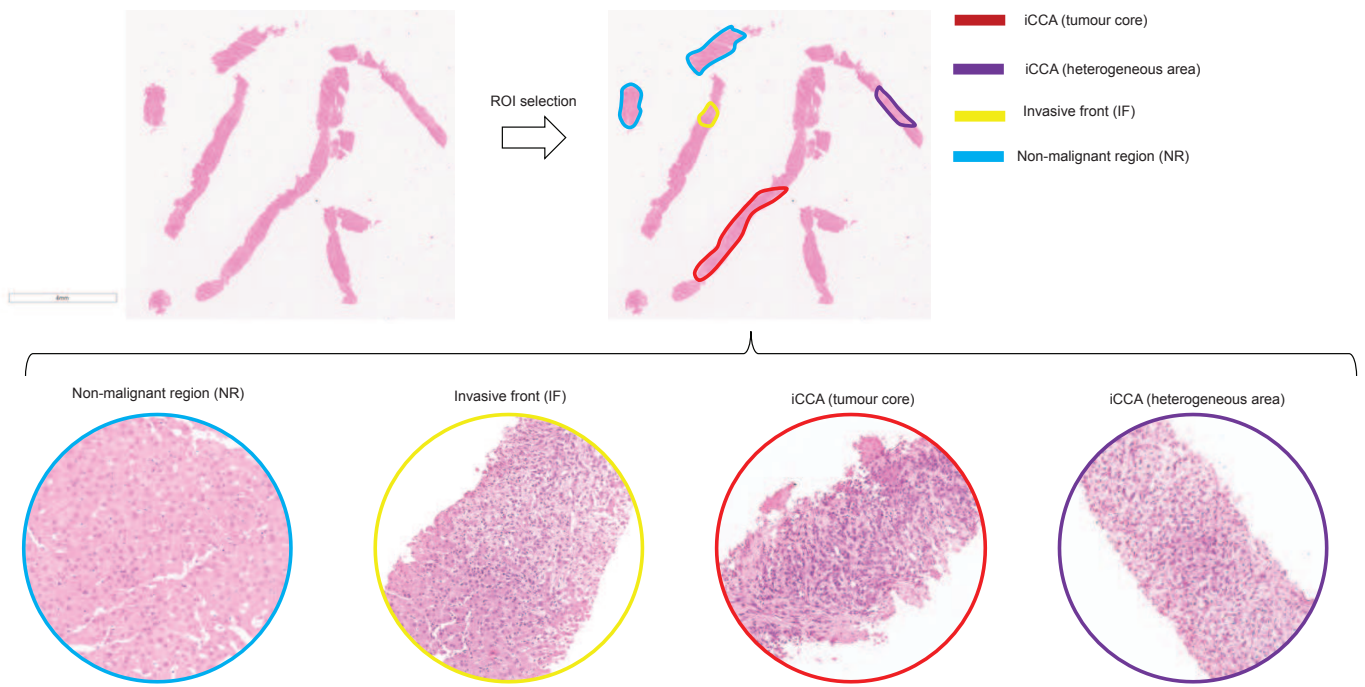

FIGURE S3
